# Supplementary material for: Prevalence of anemia by causes, and severity in different age groups in India: A Systematic Review and Meta-Analysis
Source: Research Square preprint supplement (doi:10.21203/rs.3.rs-8025230/v1), 2025-12-01
Supplement: Supplementary file 1 [file 14f0930f5c7118fcb93519f4.docx]

## Supplementary Files

The comparison of prevalence of mild, moderate and severe anemia in males and females across different age groups in NFHS-4 (2015-16) and NFHS-5 (2019-21)

**Supplementary Table 1: Table depicting comparison of prevalence of mild, moderate and severe anemia in children across different age groups in NFHS-4 (2015-16) and NFHS-5 (2019-21)**

| **Background Characteristics** | **Mild** | | **Moderate** | | **Severe** | | **Any Anemia** | | **Total number of Children** | |
| --- | --- | --- | --- | --- | --- | --- | --- | --- | --- | --- |
| **Haemoglobin levels** | **NFHS - 4** | **NFHS - 5** | **NFHS - 4** | **NFHS - 5** | **NFHS - 4** | **NFHS - 5** | **NFHS - 4** | **NFHS - 5** | **NFHS - 4** | **NFHS - 5** |
| 6-8 | 30.1% | 29.0% | 37.0% | 44.2% | 1.4% | 2.0% | 68.4% | 75.2% | 10,271 | 7,988 |
| 9-11 | 28.1% | 27.5% | 38.4% | 48.1% | 2.1% | 3.1% | 68.6% | 78.7% | 10,980 | 8,566 |
| 12-17 | 27.7% | 26.3% | 41.0% | 50.3% | 2.4% | 3.5% | 71.2% | 80.0% | 22,607 | 17,107 |
| 18-23 | 27.4% | 27.9% | 39.7% | 46.8% | 2.8% | 3.5% | 69.9% | 78.2% | 22,842 | 16,391 |
| 24-35 | 28.6% | 29.4% | 31.9% | 38.7% | 1.8% | 2.4% | 62.3% | 70.5% | 45,188 | 34,155 |
| 36-47 | 28.1% | 31.0% | 23.2% | 28.8% | 1.1% | 1.4% | 52.3% | 61.0% | 47,601 | 33,825 |
| 48-59 | 26.4% | 30.0% | 17.6% | 22.6% | 0.7% | 0.8% | 44.7% | 53.4% | 45,547 | 34,711 |

**Supplementary Table 2: Table depicting comparison of prevalence of mild, moderate and severe anemia females in NFHS-4 (2015-16) and NFHS-5 (2019-21)**

| **Background Characteristics** | **Mild** | | **Moderate** | | **Severe** | | **Any Anemia** | | **Total number of Children** | |
| --- | --- | --- | --- | --- | --- | --- | --- | --- | --- | --- |
| **Hb levels** | **NFHS - 4** | **NFHS - 5** | **NFHS - 4** | **NFHS - 5** | **NFHS - 4** | **NFHS - 5** | **NFHS - 4** | **NFHS - 5** | **NFHS - 4** | **NFHS - 5** |
| Age Groups (Years) | | | | | | | | | | |
| 15-19 | 41.2% | 26.4% | 11.9% | 30.1% | 1.0% | 2.6% | 54.1% | 59.1% | 117,711 | 114,624 |
| 20-29 | 39.3% | 26.2% | 13.0% | 28.6% | 0.9% | 2.2% | 53.1% | 56.8% | 230,947 | 223,334 |
| 30-39 | 39.3% | 25.5% | 12.1% | 28.0% | 1.1% | 2.8% | 52.5% | 56.3% | 182,462 | 187,116 |
| 40-49 | 39.4% | 24.7% | 12.4% | 28.8% | 1.2% | 3.2% | 53.0% | 56.7% | 148,325 | 156,961 |
| Residence | | | | | | | | | | |
| Urban | 38.3% | 25.2% | 11.6% | 26.2% | 0.9% | 2.4% | 50.8% | 53.8% | 230,496 | 214,754 |
| Rural | 40.3% | 25.8% | 12.8% | 29.9% | 1.1% | 2.8% | 54.2% | 58.5% | 448,950 | 467,281 |
| Maternity status | | | | | | | | | | |
| Pregnant | 24.5% | 24.4% | 24.6% | 26.3% | 1.3% | 1.4% | 50.4% | 52.2% | 30,326 | 25,802 |
| Breastfeeding | 44.5% | 27.1% | 12.6% | 31.5% | 0.9% | 2.0% | 58.0% | 60.6% | 101,598 | 96,147 |
| Neither | 39.6% | 25.4% | 11.7% | 28.4% | 1.1% | 2.8% | 52.3% | 56.6% | 547,522 | 560,086 |
| Total prevalence of anemia among women | 39.6% | 25.6% | 12.4% | 28.7% | 1.0% | 2.7% | 53.1% | 57% | 679,445 | 682,035 |

**Supplementary Table 3: Table depicting comparison of prevalence of mild, moderate and severe anemia males in NFHS-4 (2015-16) and NFHS-5 (2019-21)**

| **Background Characteristics** | **Mild** | | **Moderate** | | **Severe** | | **Any Anemia** | | **Total number of Children** | |
| --- | --- | --- | --- | --- | --- | --- | --- | --- | --- | --- |
| **Hb levels** | **NFHS - 4** | **NFHS - 5** | **NFHS - 4** | **NFHS - 5** | **NFHS - 4** | **NFHS - 5** | **NFHS - 4** | **NFHS - 5** | **NFHS - 4** | **NFHS - 5** |
| Age Groups (Years) | | | | | | | | | | |
| 15-19 | 15.5% | 25.3% | 12.5% | 5.5% | 1.2% | 0.3% | 29.2% | 31.1% | 17,912 | 14,915 |
| 20-29 | 10.1% | 17.5% | 8.0% | 3.5% | 0.9% | 0.3% | 19.0% | 21.3% | 31,090 | 25,861 |
| 30-39 | 11.3% | 18.5% | 8.6% | 4.1% | 1.1% | 0.3% | 21.0% | 22.9% | 27,203 | 23,990 |
| 40-49 | 12.6% | 22.0% | 11.0% | 5.4% | 1.4% | 0.7% | 24.9% | 28.1% | 22,517 | 20,055 |
| 50-54 | 14.4% | 24.0% | 14.0% | 7.2% | 1.9% | 0.9% | 30.3% | 32.1% | 8,318 | 7,998 |
| Residence | | | | | | | | | | |
| Urban | 9.9% | 16.8% | 7.6% | 3.5% | 0.9% | 0.2% | 18.5% | 20.4% | 36,766 | 28,670 |
| Rural | 13.2% | 22.0% | 10.9% | 5.0% | 1.2% | 0.5% | 25.3% | 27.4% | 61,955 | 56,152 |
| Total prevalence of anemia among men | 12.2% | 20.5% | 10.0% | 4.7% | 1.2% | 0.4% | 23.3% | 25.7% | 107,039 | 682,035 |
